# Supplementary material for: Flame-Retardant and Transparent Unsaturated Polyester Based on P/N Liquid Flame Retardants and Modified Halloysite Nanotubes
Source: MDPI journal article supplement (doi:10.3390/ma17030761), 2024-02-05
Supplement: s1 [file s1]

**Table S1.** Relevant data of UPR composites in the TG test.

| Samples             | T <sub>5%</sub> (°C) |     | T <sub>max</sub> (°C) |     | Residue (%) -750 |      |
|---------------------|----------------------|-----|-----------------------|-----|------------------|------|
|                     | N <sub>2</sub>       | Air | N <sub>2</sub>        | Air | N <sub>2</sub>   | Air  |
| UPR                 | 240                  | 243 | 400                   | 401 | 3.26             | 0.52 |
| UPR/20DOPO-N        | 238                  | 218 | 384                   | 385 | 5.95             | 1.42 |
| UPR/30DOPO-N        | 221                  | 205 | 369                   | 365 | 6.04             | 2.18 |
| UPR/30DOPO-N/2HNTs  | 218                  | 228 | 371                   | 368 | 6.52             | 4.19 |
| UPR/30DOPO-N/3HNTs  | 220                  | 235 | 370                   | 370 | 7.68             | 5.11 |
| UPR/30DOPO-N/2VHNTs | 244                  | 231 | 372                   | 368 | 7.78             | 5.09 |
| UPR/30DOPO-N/3VHNTs | 245                  | 249 | 372                   | 371 | 9.67             | 5.24 |

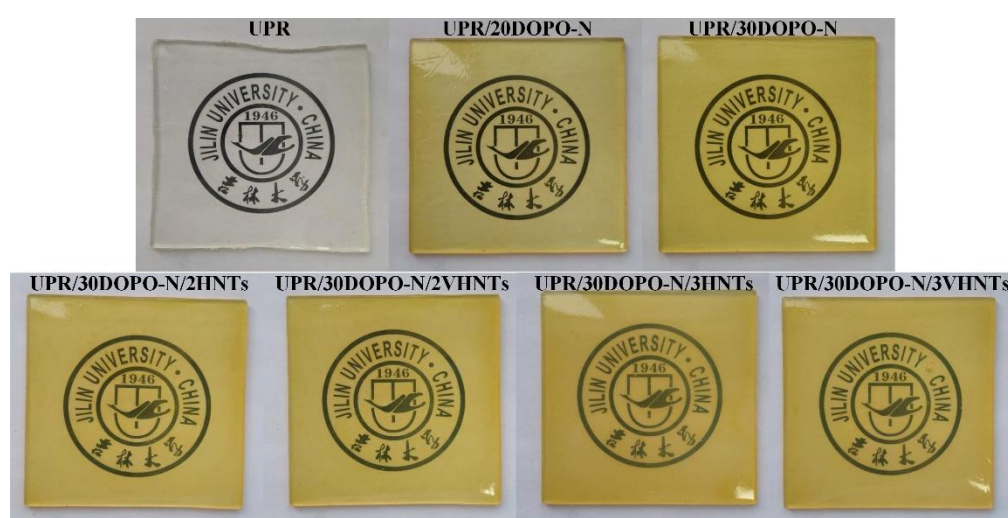**Figure S1.** Photo of light transmittance of the sample.

Figure S1 shows the transparency of pure UPR and UPR composites at a thickness of 3mm. It can be seen from the figure that all the patterns were clearly seen through the sample, indicating that all the composites exhibited good transparency in the visible light region. This transparency was due to the good compatibility between the flame retardant and the substrate.

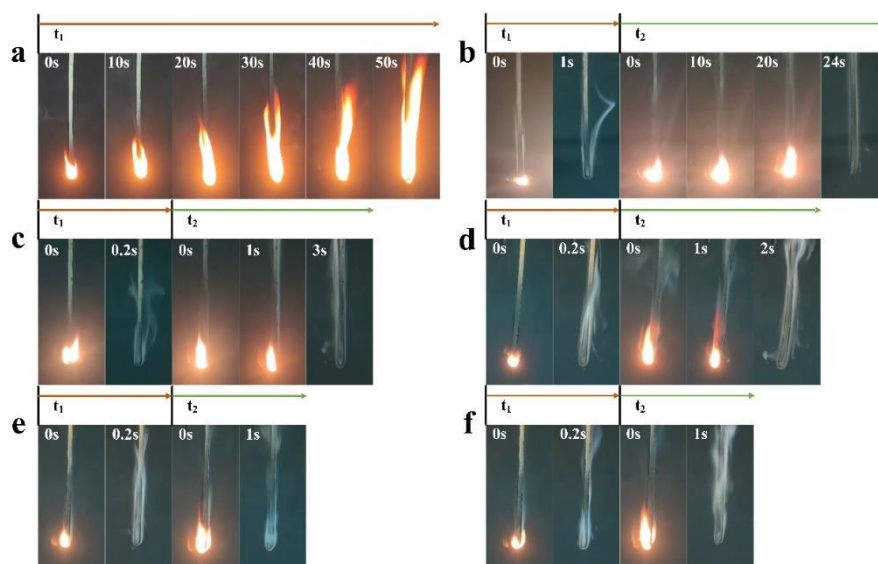

**Figure S2.** Burning process during the UL-94 vertical burning test at different times: (a) UPR, (b) UPR/30DOPO-N, (c) UPR/30DOPO-N/2HNTs, (d) UPR/30DOPON/3HNTs, (e) UPR/30DOPO-N/2VHNTs, (f) UPR/30DOPO-N/3VHNTs.

**Table S2.** CCT data of UPR and UPR composites.

| Samples             | TTI(s) | PHRR<br>(kW/m <sup>2</sup> ) | THR<br>(MJ/m <sup>2</sup> ) | Av-EHC<br>(MJ/kg) | Residues<br>(%) |
|---------------------|--------|------------------------------|-----------------------------|-------------------|-----------------|
| UPR                 | 44     | 890.28                       | 108.92                      | 20.07             | 1.69            |
| UPR/30DOPO-N        | 56     | 414.17                       | 64.32                       | 19.16             | 8.19            |
| UPR/30DOPO-N/3HNTs  | 56     | 358.10                       | 59.49                       | 19.37             | 8.83            |
| UPR/30DOPO-N/3VHNTs | 57     | 350.11                       | 56.21                       | 17.32             | 9.49            |

TTI: time to ignition; PHRR: peak of heat release rate; THR: total heat release; Av-EHC: average effective heat of combustion; TSP: total smoke production; TSR: total smoke release; Av-COY: average carbon monoxide yield; Av-CO<sub>2</sub>Y: average carbon dioxide yield.

**Table S3.** Raman test data of carbon residue.

| Samples             | AD( $\times 10^5$ ) | AG( $\times 10^5$ ) | I <sub>D</sub> /I <sub>G</sub> | FWHM(D) | FWHM(G) |
|---------------------|---------------------|---------------------|--------------------------------|---------|---------|
| UPR                 | 26.44               | 7.56                | 3.50                           | 362.83  | 98.16   |
| UPR/30DOPO-N        | 18.38               | 6.37                | 2.89                           | 303.28  | 89.81   |
| UPR/30DOPO-N/3HNTs  | 18.09               | 6.43                | 2.81                           | 308.37  | 96.76   |
| UPR/30DOPO-N/3VHNTs | 27.13               | 10.56               | 2.57                           | 301.81  | 108.23  |

AD: the integral area of D peak; AG: the integral area of G peak; I<sub>D</sub>/I<sub>G</sub>: the ratio of the area under the D bond to the area under the G bond, which is the degree of graphitization; FWHE: full width half maximum.
